# Supplementary material for: Whole Genome Sequencing of the Blue Tilapia (Oreochromis aureus) Provides a Valuable Genetic Resource for Biomedical Research on Tilapias
Source: MDPI journal article supplement (doi:10.3390/md17070386), 2019-06-28
Supplement: s1 [file s1]

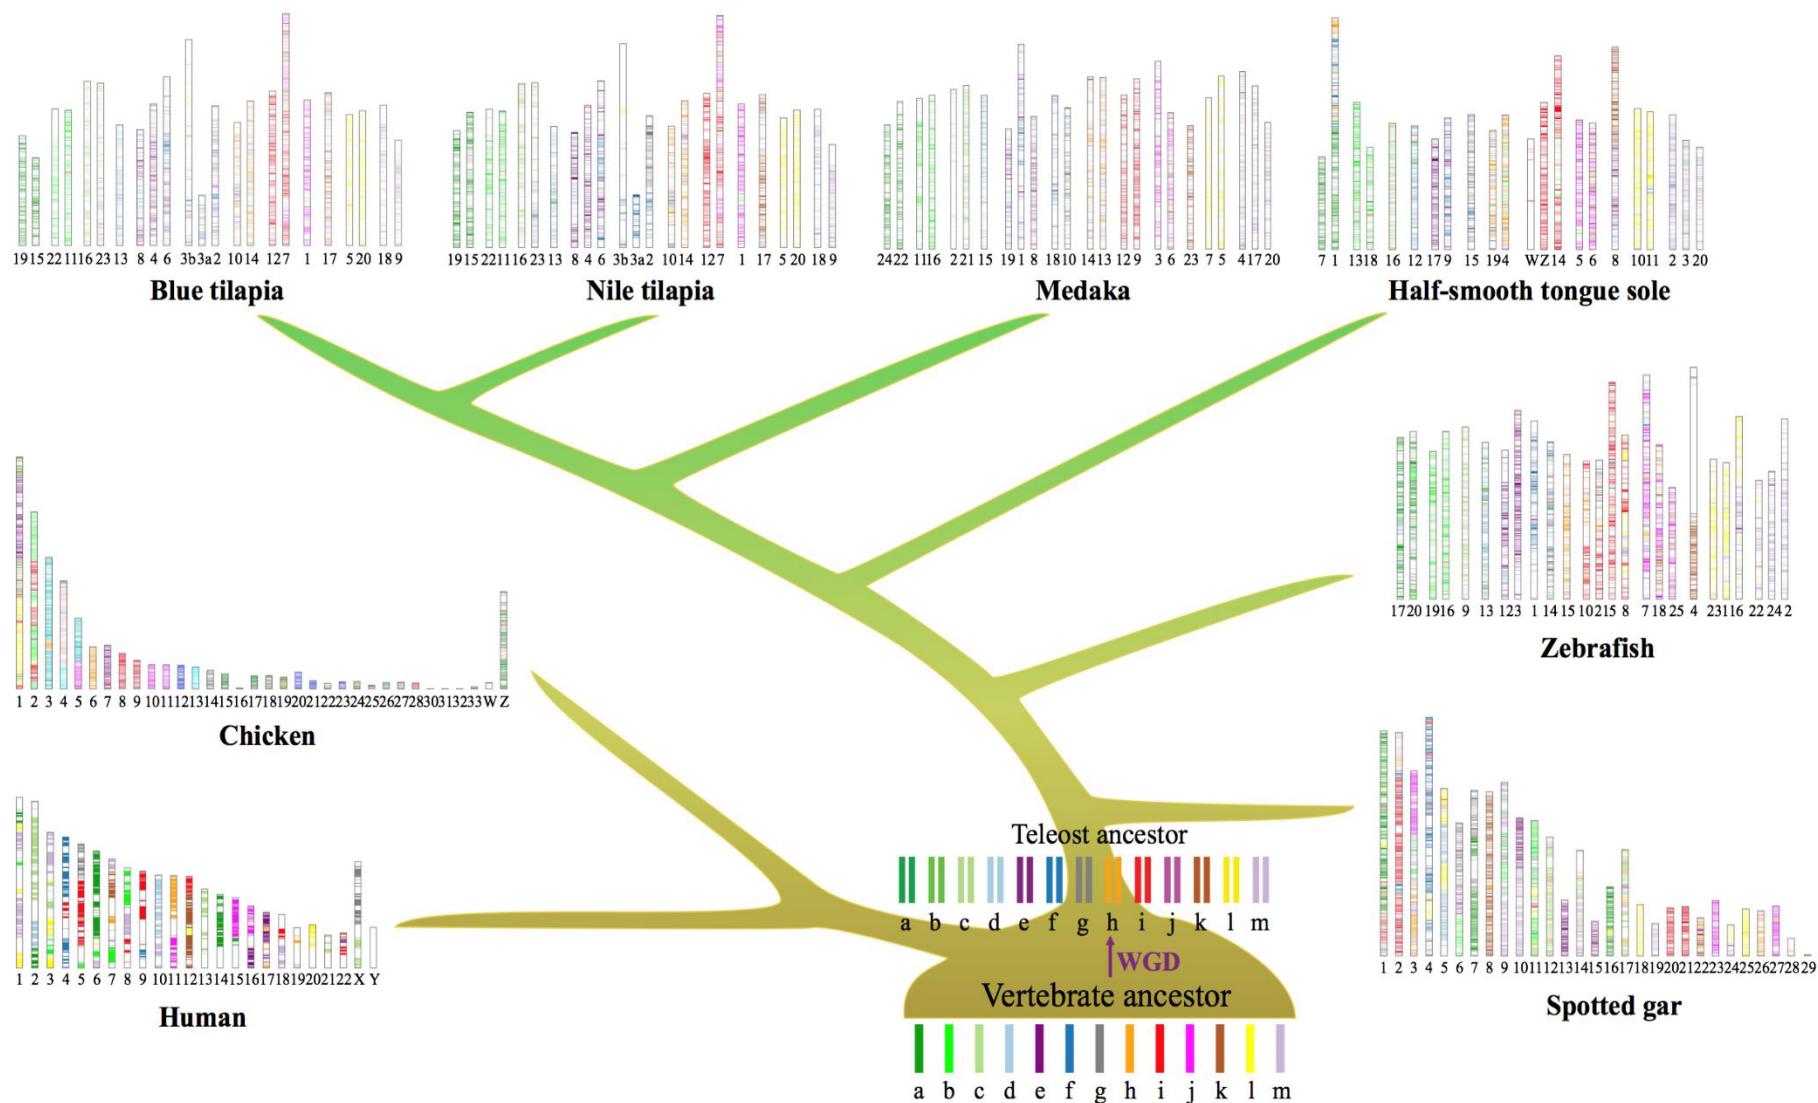

**Figure S1.** A schematic chart for the composition of ancestral chromosomes among various species. Vertebrate genomes evolved from the ancestral chromosomes through chromosomal loss, translocation, fission and fusion, and whole-genome duplication. The representative thirteen ancestral chromosomes are indicated with different colors.
